# Supplementary material
Source: publisher figshare collection journal article supplement (https://plos.figshare.com/articles/dataset/_/1049456)
Supplement: Supplementary file 1 [file 1 › Table_S1.pdf]

**Table S1: Genes whose expression is down-regulated during senescence of human diploid fibroblasts.**

| <b>Gene Symbol</b> | <b>Gene Name</b>                                             | <b>ID number</b> | <b>Molecular Function</b>                                                                                           | <b>Biological Process</b>                                                                                                                                                                                          |
|--------------------|--------------------------------------------------------------|------------------|---------------------------------------------------------------------------------------------------------------------|--------------------------------------------------------------------------------------------------------------------------------------------------------------------------------------------------------------------|
| ANLN               | Anillin                                                      | NM_018685        | actin binding                                                                                                       | regulation of exit from mitosis/septin assembly and septum formation                                                                                                                                               |
| ASNS               | Asparagine synthetase                                        | NM_001673        | asparagine synthase (glutamine-hydrolyzing) activity/ligase activity                                                | asparagine biosynthesis/glutamine metabolism                                                                                                                                                                       |
| ASPM               | Abnormal spindle-like microcephaly-associated protein        | NM_018136        | calmodulin binding                                                                                                  | developmental growth/negative regulation of neuron differentiation/mitosis/oogenesis/positive regulation of neuroblast proliferation                                                                               |
| ATAD2              | ATPase family, AAA domain containing 2                       | NM_014109        | ATP binding/ATPase activity                                                                                         | regulation of transcription, DNA-dependent                                                                                                                                                                         |
| BIRC5              | Survivin                                                     | NM_001168        | Ran GTPase binding/chaperone binding/ion binding/microtubule binding/cysteine-type endopeptidase inhibitor activity | negative regulation of apoptotic process/cell division/mitosis/protein phosphorylation/transcription, DNA-dependent                                                                                                |
| BRCA2              | Breast cancer 2                                              | NM_000059        | H3 histone acetyltransferase activity/gamma-tubulin binding/protein binding/single strand DNA binding               | DNA damage response, signal transduction by p53 class mediator resulting in transcription of p21 class mediator/DNA repair/brain development/cell aging/regulation of mitotic cell cycle/regulation of cytokinesis |
| BUB1               | Budding Uninhibited by Benzimidazoles 1 homolog (yeast)      | NM_004336        | ATP binding/protein binding/protein kinase activity                                                                 | apoptosis/cell proliferation/mitosis/spindle assembly checkpoint                                                                                                                                                   |
| BUB1B              | Budding Uninhibited by Benzimidazoles 1 homolog Beta (yeast) | NM_001211        | ATP binding/protein binding/protein kinase activity                                                                 | anaphase-promoting complex-dependent proteasomal ubiquitin-dependent protein catabolic process/apoptotic process/cell cycle/cell division/cell proliferation                                                       |
| BUB3               | Budding Uninhibited by Benzimidazoles 3 homolog (yeast)      | NM_004725        | protein binding                                                                                                     | mitotic spindle checkpoint/cell proliferation                                                                                                                                                                      |
| CCL20              | chemokine (C-C motif) ligand 20                              | NM_004591        | chemokine activity                                                                                                  | cell-cell signaling/chemokinesis/chemotaxis/defence response to bacterium/immune response/inflammatory response/signal transduction                                                                                |
| CCNA2              | Cyclin A2                                                    | NM_001237        | protein kinase binding                                                                                              | mitotic G2 checkpoint/regulation of CDK activity/cytokinesis                                                                                                                                                       |
| CCNB2              | Cyclin B2                                                    | NM_004701        | protein kinase binding                                                                                              | G2/M transition of mitotic cell cycle/T cell homeostasis/cell division/growth/in utero embryonic development                                                                                                       |
| CCNE2              | Cyclin E2                                                    | NM_057749        | protein kinase binding                                                                                              | cell cycle checkpoint/regulation of CDK activity/cytokinesis                                                                                                                                                       |
| CDC2               | Cell division cycle 2                                        | NM_001786        | cyclin-dependent protein kinase activity/ATP binding/transferase activity                                           | start control point of mitotic cell cycle/protein amino acid phosphorylation/cytokinesis                                                                                                                           |
| CDC25A             | Cell division cycle 25A                                      | NM_001789        | protein binding/protein tyrosine phosphatase activity                                                               | DNA replication/mitosis/cell division/cell proliferation/cellular response to UV                                                                                                                                   |
| CDC25B             | Cell division cycle 25B                                      | NM_021874        | protein tyrosine phosphatase activity                                                                               | positive regulation of cell proliferation/mitosis/regulation of cell cycle                                                                                                                                         |
| CDCA2              | Cell division cycle associated 2                             | NM_152562        | protein binding                                                                                                     | cell division/mitosis                                                                                                                                                                                              |
| CDCA4              | Cell division cycle associated 4                             | NM_017955        | null                                                                                                                | null                                                                                                                                                                                                               |
| CDCA7              | Cell division cycle associated 7                             | NM_031942        | null                                                                                                                | regulation of cell proliferation/regulation of transcription, DNA dependent                                                                                                                                        |

|         |                                               |           |                                                                                                                  |                                                                                                                                                                         |
|---------|-----------------------------------------------|-----------|------------------------------------------------------------------------------------------------------------------|-------------------------------------------------------------------------------------------------------------------------------------------------------------------------|
| CDKN2C  | Cyclin-dependent kinase inhibitor 2C (p18)    | NM_001262 | cyclin-dependent protein serine/threonine kinase inhibitor activity/protein binding                              | G1/S transition of mitotic cell cycle/cell cycle arrest/negative regulation of proliferation/negative regulation of phosphorylation/oligodendrocyte differentiation     |
| CDKN3   | Cyclin-dependent kinase inhibitor 3           | NM_005192 | proteine binding/proteine kinase activity                                                                        | G1/S transition of mitotic cell cycle/cell cycle arrest/negative regulation of proliferation/peptidyl-tyrosine dephosphorylation                                        |
| CENPE   | Centromere protein E (312kD)                  | NM_001813 | ATP binding/kinetochore binding/microtubule motor activity                                                       | cell division/blood coagulation/kinetochore assembly/microtubule-based movement/mitosis/multicellular organism development                                              |
| CENPF   | Centromere protein F, 350/400ka (mitosin)     | NM_016343 | chromatin binding/dynein binding/protein C-terminus binding/transcription factor binding                         | DNA replication/mitotic cell cycle/cell differentiation/cell proliferation/cell division/chromosome segregation/protein transport/kinetochore assembly/response to drug |
| CENPH   | Centromere protein H                          | NM_022909 | kinetochore binding/protein binding                                                                              | cell division/chromosome segregation/kinetochore organization/mitotic cell cycle/nucleosome assembly                                                                    |
| CEP55   | Centrosomal protein 55kDa                     | NM_018131 | protein binding                                                                                                  | cytokinesis/mitosis                                                                                                                                                     |
| CKAP2   | Cytoskeleton associated protein 2             | AK022982  | null                                                                                                             | apoptotic process/mitotic cytokinesis/negative regulation of microtubule depolymerization/positive regulation of transcription from RNA polymerase II promoter          |
| CKS2    | CDC28 protein kinase 2                        | NM_001827 | cyclin-dependent protein kinase activity                                                                         | regulation of CDK activity/cell cycle/cytokinesis                                                                                                                       |
| COL15A1 | Collagen, type XV, alpha 1                    | NM_001855 | extracellular matrix structural constituent                                                                      | angiogenesis/cell adhesion/cell differentiation/collagen catabolic process/extracellular matrix organization/signal transduction                                        |
| COLEC12 | Collectin sub-family member 12                | NM_030781 | galactose binding/low-density lipoprotein particle binding/metal ion binding/scavenger receptor activity         | carbohydrate mediated signaling/defense response/innate immune response/phagocytosis, recognition                                                                       |
| CSNK1G1 | casein kinase 1, gamma 1                      | NM_014736 | ATP binding/glycoprotein binding/magnesium ion binding/phosphoprotein binding                                    | Wnt receptor signaling pathway/protein autophosphorylation                                                                                                              |
| CTNNAL1 | Catenin, alpha-like 1                         | NM_003798 | cadherin binding/structural molecule activity                                                                    | Rho protein signal transduction/cell adhesion                                                                                                                           |
| CYP1B1  | Cytochrome P450, subfamily I, polypeptide 1   | NM_000104 | aromatase activity/electron carrier activity/heme binding/iron ion binding/monooxygenase activity/oxygen binding | angiogenesis/arachidonic acid metabolic process/cellular aromatic metabolic process/oxidation-reduction process/epoxygenase P450 pathway                                |
| DDX18   | DEAD (Asp-Glu-Ala-Asp) box polypeptide 18     | NM_006773 | ATP dependent RNA helicase activity/ATP binding/RNA binding                                                      | null                                                                                                                                                                    |
| DEK     | DEK oncogene (DNA binding)                    | NM_003472 | DNA binding/histone binding                                                                                      | chromatin modification/redulation of double-strand break repair/signal transduction                                                                                     |
| DEPDC1  | DEP domain containing 1                       | NM_017779 | GTPase activator activity/protein binding                                                                        | intracellular signal transduction/negative regulation of transcription, DNA dependent                                                                                   |
| DHFR    | Dihydrofolate reductase                       | NM_000791 | dihydrofolate reductase activity/oxidoreductase activity                                                         | glycine biosynthesis/one-carbon compound metabolism/nucleotide biosynthesis                                                                                             |
| DLGAP5  | Discs Large Associated Protein 5 (Drosophila) | NM_014750 | phosphoprotein phosphatase activity/protein binding                                                              | cell proliferation/cell-cell signaling/M phase of mitotic cell cycle                                                                                                    |
| DONSON  | Downstream neighbor of SON                    | NM_017613 | null                                                                                                             | null                                                                                                                                                                    |
| DTYMK   | Deoxythymidylate kinase                       | NM_012145 | thymidylate kinase activity/ATP binding/kinase activity/transferase activity                                     | cell cycle/DNA metabolism/dTDP biosynthesis/dTTP biosynthesis/nucleotide biosynthesis                                                                                   |

|          |                                                                |           |                                                                                                                                                                     |                                                                                                                                                                                                                                                                        |
|----------|----------------------------------------------------------------|-----------|---------------------------------------------------------------------------------------------------------------------------------------------------------------------|------------------------------------------------------------------------------------------------------------------------------------------------------------------------------------------------------------------------------------------------------------------------|
| EIF4EBP1 | Eukaryotic translation initiation factor 4E binding protein 1  | NM_004095 | protein biosynthesis inhibitor activity                                                                                                                             | regulation of translation/regulation of protein biosynthesis                                                                                                                                                                                                           |
| ENO1     | Enolase 1, (alpha)                                             | NM_001428 | phosphopyruvate hydratase activity/transcription co-repressor activity/DNA binding/transcription factor activity                                                    | negative regulation of transcription from Pol II promoter                                                                                                                                                                                                              |
| ENPP2    | Ectonucleotide pyrophosphatase/phosphodiesterase 2 (autotaxin) | NM_006209 | phosphodiesterase I activity/nucleotide diphosphatase activity/nucleic acid binding/transcription factor binding/endonuclease activity/hydrolase activity           | nucleotide metabolism/phosphate metabolism/G-protein coupled receptor protein signaling pathway/chemotaxis/cell motility                                                                                                                                               |
| EXO1     | Exonuclease 1                                                  | NM_003686 | 5'-3' exodeoxyribonuclease activity/DNA binding/flap endonuclease activity/metal ion binding/protein binding/ribonuclease H activity/structure-specific DNA binding | DNA recombination/DNA repair/isotype switching/mismatch repair                                                                                                                                                                                                         |
| FBL      | Fibrillarin                                                    | NM_001436 | RNA binding                                                                                                                                                         | rRNA processing                                                                                                                                                                                                                                                        |
| FBXO5    | F-box only protein 5                                           | NM_012177 | metal ion binding/protein kinase binding                                                                                                                            | cell division/mitosis/microtubule polymerization/negative regulation of meiosis/negative regulation of ubiquitin-protein ligase activity involved in mitotic cell cycle/oocyte maturation/vesicle organization                                                         |
| FOXO1    | Forkhead box M1                                                | NM_021953 | DNA binding/transcription factor binding                                                                                                                            | DNA damage response, signal transduction by p53 class mediator resulting in transcription of p21 class mediator/DNA repair/negative regulation of cell aging/regulation of transcription/regulation of cell proliferation/regulation of cell growth/tissue development |
| FST      | Follistatin                                                    | NM_006350 | activin inhibitor activity                                                                                                                                          | development/negative regulation of follicle-stimulating hormone secretion                                                                                                                                                                                              |
| GLUL     | Glutamate-Ammonia Ligase                                       | NM_002065 | glutamate-ammonia ligase activity/ligase activity                                                                                                                   | regulation of neurotransmitter levels/glutamine biosynthesis/nitrogen fixation                                                                                                                                                                                         |
| GMNN     | Geminin                                                        | NM_015895 | histone deacetylase binding/protein binding/repressing transcription factor binding                                                                                 | negative regulation of DNA replication/cell cycle arrest/cell cycle                                                                                                                                                                                                    |
| GPC6     | Glypican 6                                                     | NM_005708 | transmembrane receptor activity                                                                                                                                     | cell growth and/or maintenance/development                                                                                                                                                                                                                             |
| GTSE1    | G-2 and S-phase expressed 1                                    | NM_016426 | molecular_function unknown                                                                                                                                          | G2 phase of mitotic cell cycle/DNA damage response, signal transduction by p53 class mediator resulting in cell cycle arrest/microtubule-based process                                                                                                                 |
| H2AFX    | H2A histone family, member X                                   | NM_002105 | DNA binding                                                                                                                                                         | nucleosome assembly/chromosome organization and biogenesis (sensu Eukarya)                                                                                                                                                                                             |
| H2AFZ    | H2A histone family, member Z                                   | NM_002106 | DNA binding/protein heterodimerization activity                                                                                                                     | nucleosome assembly                                                                                                                                                                                                                                                    |
| H3F3B    | H3 histone family, member 3B                                   | NM_005324 | DNA binding                                                                                                                                                         | nucleosome assembly/chromosome organization and biogenesis (sensu Eukarya)                                                                                                                                                                                             |
| HAT1     | Histone acetyltransferase 1                                    | NM_003642 | histone acetyltransferase activity/acyltransferase activity/protein binding/transferase activity                                                                    | internal protein amino acid acetylation/DNA packaging                                                                                                                                                                                                                  |
| HELLS    | Helicase, lymphoid-specific                                    | NM_018063 | ATP binding/DNA binding/helicase activity                                                                                                                           | cell division/centromeric heterochromatin assembly/lymphocyte proliferation/maintenance of DNA methylation                                                                                                                                                             |
| HMGB1    | High-mobility group box 1                                      | NM_002128 | single-stranded DNA binding                                                                                                                                         | regulation of transcription, DNA-dependent/DNA unwinding                                                                                                                                                                                                               |

|          |                                                                     |           |                                                                                                                  |                                                                                                                                                                                                                  |
|----------|---------------------------------------------------------------------|-----------|------------------------------------------------------------------------------------------------------------------|------------------------------------------------------------------------------------------------------------------------------------------------------------------------------------------------------------------|
| HMGB2    | High-mobility group box 2                                           | NM_002129 | single-stranded DNA binding                                                                                      | DNA ligation involved in DNA repair/DNA topological change/V(D)J recombination/apoptotic process/cell chemotaxis/nucleosome assembly                                                                             |
| HMG2     | High-mobility group nucleosomal binding domain 2                    | NM_005517 | nucleosomal DNA binding                                                                                          | chromatin organization/regulation of transcription, DNA-dependent                                                                                                                                                |
| HNRPA2B1 | Heterogeneous nuclear ribonucleoprotein A2/B1                       | NM_031243 | heterogeneous nuclear ribonucleoprotein/RNA binding                                                              | RNA processing                                                                                                                                                                                                   |
| HNRPA2B  | Heterogeneous nuclear ribonucleoprotein A/B                         | NM_031266 | RNA binding                                                                                                      | epithelial to mesenchymal transition/positive regulation of transcription, DNA-dependent                                                                                                                         |
| ID4      | Inhibitor of DNA binding 4                                          | NM_001546 | transcription co-repressor activity                                                                              | regulation of transcription from Pol II promoter                                                                                                                                                                 |
| ITGB3BP  | Integrin beta 3 binding protein (beta3-endonexin)                   | NM_014288 | protein C-terminus binding/protein binding/signal transducer activity                                            | cell adhesion/signal transduction                                                                                                                                                                                |
| KDM1A    | Lysine (K)-specific demethylase 1A                                  | NM_015013 | RNA polymerase II repressing transcription factor activity/demethylase activity/oxidoreductase activity          | blood coagulation/cell proliferation/histone demethylation/negative regulation of DNA binding/negative regulation of DNA damage response                                                                         |
| KHDRBS1  | KH domain containing, RNA binding, signal transduction associated 1 | NM_006559 | mRNA binding/single-stranded DNA binding/single-stranded RNA binding/DNA binding                                 | G1/S transition of mitotic cell cycle/cell cycle arrest/mRNA processing/RAS protein signal transduction/cell proliferation/signal transduction                                                                   |
| KIF11    | Kinesin family member 11                                            | NM_004523 | microtubule motor activity/ATP binding                                                                           | mitotic spindle assembly                                                                                                                                                                                         |
| KIF20B   | Kinesin family member 20B                                           | NM_016195 | ATP binding/ATPase activity/WW domain binding/microtubule binding/microtubule motor activity                     | ATP catabolic process/mitosis/cell cycle arrest/microtubule-based movement                                                                                                                                       |
| KIF22    | Kinesin family member 22                                            | NM_007317 | microtubule motor activity/DNA binding                                                                           | mitosis                                                                                                                                                                                                          |
| KIF23    | Kinesin family member 23                                            | NM_004856 | microtubule motor activity/adenosinetriphosphatase activity                                                      | mitotic spindle elongation                                                                                                                                                                                       |
| KITLG    | KIT ligand                                                          | NM_000899 | cytokine activity/growth factor activity                                                                         | cell adhesion/cell proliferation/embryonic hemopoiesis/germ cell programmed cell death/signal transduction                                                                                                       |
| KNTC1    | Kinetochore associated 1                                            | NM_014708 | protein binding                                                                                                  | cell division/mitosis/protein complex assembly                                                                                                                                                                   |
| KPNA2    | Karyopherin alpha 2 (RAG cohort 1, importin alpha 1)                | NM_002266 | nuclear localization sequence binding/protein transporter activity/protein binding                               | regulation of DNA recombination/G2 phase of mitotic cell cycle/spindle pole body and microtubule cycle (sensu Saccharomyces)/NLS-bearing substrate-nucleus import/intracellular protein transport/DNA metabolism |
| LBR      | Lamin B receptor                                                    | NM_002296 | lamin/chromatin binding/lamin binding/DNA binding/receptor activity                                              | cholesterol biosynthetic process                                                                                                                                                                                 |
| LMNB2    | Lamin B2                                                            | NM_032737 | structural molecule activity                                                                                     | S-specific transcription in mitotic cell cycle                                                                                                                                                                   |
| MAD2L1   | MAD2-like 1                                                         | NM_002358 | protein binding/protein homodimerization activity                                                                | cell division/mitotic cell cycle/negative regulation of apoptotic process                                                                                                                                        |
| MAPK13   | MAP Kinase 13                                                       | NM_002754 | MAP kinase activity/ATP binding/protein serine/threonine kinase activity/MP kinase activity/transferase activity | protein kinase cascade/cell cycle/response to stress/protein amino acid phosphorylation/regulation of translation/signal transduction/antimicrobial humoral response (sensu Vertebrata)                          |
| MARCKS   | Myristoylated alanine-rich protein kinase C substrate               | NM_002356 | calmodulin binding/actin cross-linking activity                                                                  | cell motility                                                                                                                                                                                                    |
| MCM3     | Minichromosome maintenance deficient 3 (S. cerevisiae)              | NM_002388 | DNA dependent ATPase activity/ATP binding/DNA binding                                                            | cell cycle/DNA replication/DNA replication initiation/regulation of transcription, DNA-dependent                                                                                                                 |

|                |                                                                                                      |           |                                                                                                                                      |                                                                                                                                 |
|----------------|------------------------------------------------------------------------------------------------------|-----------|--------------------------------------------------------------------------------------------------------------------------------------|---------------------------------------------------------------------------------------------------------------------------------|
| MCM4           | Minichromosome maintenance deficient 4 ( <i>S. cerevisiae</i> )                                      | NM_182746 | ATP binding/contributes to ATP-dependent DNA helicase activity/protein binding/single-strand DNA binding                             | DNA replication/mitotic cell cycle                                                                                              |
| MCM5           | Minichromosome maintenance deficient 5 ( <i>S. cerevisiae</i> )                                      | NM_006739 | DNA dependent ATPase activity/ATP binding/DNA binding                                                                                | DNA replication/DNA replication initiation/regulation of transcription, DNA-dependent/regulation of cell cycle                  |
| MEIS1          | Meis homeobox 1                                                                                      | NM_002398 | RNA polymerase II distal enhancer sequence-specific DNA binding transcription factor activity/protein binding                        | angiogenesis/definitive hemopoiesis/negative regulation of neuron differentiation                                               |
| MELK           | Maternal Embryonic Leucine zipper Kinase                                                             | NM_014791 | ATP binding/protein serine/threonine kinase activity/transferase activity                                                            | protein amino acid phosphorylation                                                                                              |
| MKI67          | Antigen identified by monoclonal antibody Ki-67                                                      | NM_002417 | ATP binding/protein binding                                                                                                          | DNA metabolic process/cell proliferation/meiosis/cellular response to heat/organ regeneration                                   |
| MTHFD2         | Methylenetetrahydrofolate dehydrogenase (NADP+ dependent) 2, methenyltetrahydrofolate cyclohydrolase | X16396    | magnesium ion binding/methenyltetrahydrofolate cyclohydrolase activity/methenyltetrahydrofolate dehydrogenase activity               | folic acid-containing compound biosynthetic process/one carbon metabolic process/response to heat                               |
| MYH10          | Myosin Heavy Chain 10, non muscular                                                                  | NM_005964 | actin binding/ATP binding/motor activity/calmodulin binding                                                                          | cytokinesis                                                                                                                     |
| NASP           | Nuclear autoantigenic sperm protein                                                                  | NM_002482 | hsp90 protein binding/histone binding                                                                                                | DNA packaging/spermatogenesis                                                                                                   |
| NEK2           | NIMA-related kinase 2                                                                                | NM_002497 | ATP binding/protein serine/threonine kinase activity/transferase activity                                                            | regulation of mitosis/meiosis/protein amino acid phosphorylation/cytokinesis                                                    |
| NETO2          | neuropilin (NRP) and tolloid (TLL)-like 2                                                            | NM_018092 | null                                                                                                                                 | null                                                                                                                            |
| NOL5A          | Nucleolar protein 5A (56kD with KKE/D repeat)                                                        | NM_006392 | RNA binding/DNA binding                                                                                                              | rRNA processing/regulation of transcription, DNA-dependent                                                                      |
| NQO1           | NAD(P)H dehydrogenase, quinone 1                                                                     | NM_000903 | NAD(P)H dehydrogenase (quinone) activity/cytochrome-b5 reductase activity/oxidoreductase activity                                    | nitric oxide biosynthesis/response to toxin/synaptic transmission, cholinergic/xenobiotic metabolism/electron transport         |
| NREP (C5orf13) | Neuronal Regeneration Related Protein                                                                | NM_004772 | protein binding                                                                                                                      | axon regeneration/regulation of neuron differentiation/regulation of transforming growth factor beta receptor signaling pathway |
| NRP1           | Neuropilin 1                                                                                         | NM_003873 | coreceptor activity/cytokine binding/heparin binding/metal ion binding/semaphorin receptor activity/VEGF-activated receptor activity | axon guidance/cell adhesion/cell-cell signaling/endothelial cell chemotaxis/organ morphogenesis                                 |
| NUF2           | NDC80 kinetochore complex component, homolog ( <i>S. cerevisiae</i> )                                | NM_031423 | protein binding                                                                                                                      | cell division/mitosis                                                                                                           |
| NUSAP1         | Nucleolar and spindle associated protein 1                                                           | NM_016359 | DNA binding/microtubule binding                                                                                                      | positive regulation of mitosis                                                                                                  |
| PA2G4          | Proliferation-associated 2G4, 38kD                                                                   | NM_006191 | methionyl aminopeptidase activity/hydrolase activity                                                                                 | cell cycle arrest/proteolysis and peptidolysis/cell proliferation                                                               |
| PBK            | PDZ binding kinase                                                                                   | NM_018492 | ATP binding/protein binding/protein serine-threonine kinase activity                                                                 | mitosis/protein phosphorylation                                                                                                 |
| PCNA           | Proliferating cell nuclear antigen                                                                   | NM_002592 | DNA binding/DNA polymerase processivity factor activity                                                                              | regulation of DNA replication/DNA replication/DNA repair/cell proliferation/regulation of cell cycle                            |

|          |                                                        |           |                                                                                                                     |                                                                                                                                                 |
|----------|--------------------------------------------------------|-----------|---------------------------------------------------------------------------------------------------------------------|-------------------------------------------------------------------------------------------------------------------------------------------------|
| PCOLCE   | Procollagen C-endopeptidase enhancer                   | NM_002593 | collagen binding/heparin binding/peptidase activator activity                                                       | multicellular organismal development/positive regulation of peptidase activity/roteolysis                                                       |
| PHGDH    | Phosphoglycerate dehydrogenase                         | BC011262  | NAD binding/electron carrier activity/phosphoglycerate dehydrogenase activity                                       | cellular amino acid biosynthetic process/glia cell development                                                                                  |
| PLK1     | Polo-Like Kinase 1                                     | NM_005030 | ATP binding/anaphase-promoting complex binding/kinase activity/microtubule binding                                  | G2 DNA damage checkpoint/mitosis/cytokinesis/cell proliferation/positive regulation of proteolysis                                              |
| POLE     | DNA Polymerase epsilon                                 | NM_006231 | nucleotide binding/3'-5' exonuclease activity/DNA-directed DNA polymerase activity/DNA binding/transferase activity | DNA replication/DNA repair                                                                                                                      |
| PRC1     | Protein regulator of cytokinesis 1                     | NM_003981 | protein binding/microtubule binding/                                                                                | cytokinesis/mitotic spindle elongation                                                                                                          |
| PRIM1    | Primase, polypeptide 1                                 | NM_000946 | DNA primase activity/metal ion binding                                                                              | DNA replication/DNA strand elongation involved in DNA repair/mitotic cell cycle/telomere maintenance                                            |
| PTMA     | Prothymosin, alpha                                     | NM_002823 | null                                                                                                                | transcription, DNA-dependent                                                                                                                    |
| PTTG1    | Pituitary Tumor Transforming 1                         | NM_004219 | transcription factor activity                                                                                       | spermatogenesis/oncogenesis/transcription from Pol II promoter                                                                                  |
| RAD51    | RAD51                                                  | NM_002875 | DNA dependent ATPase activity/damaged DNA binding/nucleotide binding/ATP binding                                    | mitotic recombination/meiotic recombination/DNA repair                                                                                          |
| RAD51AP1 | RAD51-interacting protein                              | NM_006479 | RNA binding/DNA binding/protein binding                                                                             | DNA repair                                                                                                                                      |
| RBBP8    | Retinoblastoma binding protein 8                       | NM_002894 | RNA polymerase II repressing transcription factor activity/damage DNA binding/protein binding                       | DNA repair/cell division/blastocyst hatching/meiosis/mitosis/negative regulation of transcription from RNA polymerase II promoter               |
| RCC1     | Regulator of chromosome condensation 1                 | NM_001269 | Ran guanyl-nucleotide exchange factor activity/chromatin binding/histone binding                                    | cell division/mitosis/viral process                                                                                                             |
| RFC2     | Replication factor C (activator 1) 2 (40kD)            | NM_002914 | nucleotide binding/ATP binding/DNA binding                                                                          | DNA replication                                                                                                                                 |
| RFC3     | Replication factor C (activator 1) 3 (40kD)            | NM_002915 | nucleotide binding/DNA-directed DNA polymerase activity/enzyme activator activity/DNA binding                       | DNA replication                                                                                                                                 |
| RFC4     | Replication factor C (activator 1) 4 (37kD)            | NM_002916 | nucleotide binding/DNA-directed DNA polymerase activity/enzyme activator activity/DNA binding                       | DNA replication                                                                                                                                 |
| RPL36A   | Ribosomal protein L36a                                 | NM_021029 | structural constituent of ribosome                                                                                  | RNA metabolic process/SRP-dependent cotranslational protein targeting to membrane/gene expression/ protein metabolism/translation/viral process |
| RPL5     | Ribosomal protein L5                                   | NM_000969 | structural constituent of ribosome/rRNA binding/5S rRNA binding                                                     | protein biosynthesis                                                                                                                            |
| RRM2     | Ribonucleotide reductase M2 polypeptide                | NM_001034 | ribonucleoside-diphosphate reductase activity/oxidoreductase activity                                               | DNA replication/deoxyribonucleoside diphosphate metabolism                                                                                      |
| SCARA3   | CSR1 protein                                           | NM_016240 | scavenger receptor activity                                                                                         | UV protection/response to oxidative stress                                                                                                      |
| SENP1    | Sentrin/SUMO-specific protease                         | NM_014554 | endopeptidase activity/cysteine-type peptidase activity                                                             | proteolysis and peptidolysis                                                                                                                    |
| SGOL2    | Shugoshin-like 2 (S. pombe)                            | NM_152524 | protein binding                                                                                                     | cell division/meiotic sister chromatid cohesion, centromeric/mitotic cell cycle                                                                 |
| SHCBP1   | SHC SH2 domain binding protein 1                       | NM_024745 | SH2 domain binding                                                                                                  | fibroblast growth factor receptor signaling pathway/regulation of neural precursor cell proliferation                                           |
| SMC2     | Structural Maintenance of Chromosomes 2-like 1 (yeast) | NM_006444 | ATP binding/ATP-binding cassette (ABC) transporter activity                                                         | mitotic chromosome condensation/mitotic chromosome segregation/transport/chromosome organization and biogenesis (sensu Eukarya)/mitosis         |

|                         |                                                        |              |                                                                                                                                                                                                  |                                                                                                                                                                         |
|-------------------------|--------------------------------------------------------|--------------|--------------------------------------------------------------------------------------------------------------------------------------------------------------------------------------------------|-------------------------------------------------------------------------------------------------------------------------------------------------------------------------|
| SMC4L1                  | Structural Maintenance of Chromosomes 4-like 1 (yeast) | AL136877     | ATP binding/ATP-binding cassette (ABC) transporter activity/DNA supercoiling activity/protein heterodimerization activity                                                                        | mitotic chromosome condensation/mitotic chromosome segregation/transport/cell cycle/chromosome organization and biogenesis (sensu Eukarya)/mitosis                      |
| SOCS2                   | Suppressor of cytokine signaling 2                     | NM_003877    | JAK pathway signal transduction adaptor activity/SH3-SH2 adaptor activity/prowth hormone receptor binding/insulin-like growth factor receptor binding/prolactin receptor binding/protein binding | JAK-STAT cascade/aging/cellular response to hormone stimulus/negative regulation of apoptotic process/negative regulation of signal transduction/protein ubiquitination |
| TCF19                   | Transcription factor 19 (SC1)                          | NM_001077511 | transcription factor activity                                                                                                                                                                    | cell proliferation/regulation of cell cycle/regulation of transcription from Pol II promoter                                                                            |
| TCOF1                   | Treacher Collins-Franceschetti syndrome 1              | NM_000356    | transporter activity                                                                                                                                                                             | nucleocytoplasmic transport/skeletal development                                                                                                                        |
| TK1                     | thymidine kinase 1                                     | NM_003258    | thymidine kinase activity/ATP binding/kinase activity/transferase activity                                                                                                                       | DNA metabolism                                                                                                                                                          |
| TMPO                    | Thymopoietin                                           | NM_003276    | lamin/chromatin binding/lamin binding                                                                                                                                                            | regulation of transcription, DNA-dependent/transcription                                                                                                                |
| TNC                     | Tenascin C                                             | NM_002160    | binding/cell adhesion receptor activity                                                                                                                                                          | cell adhesion                                                                                                                                                           |
| TOP2A (target noto 494) | Topoisomerase (DNA) II alpha (170kD)                   | NM_001067    | DNA topoisomerase type II activity/ATP binding/DNA binding/isomerase activity                                                                                                                    | DNA metabolism/DNA topological change                                                                                                                                   |
| TOPBP1                  | Topoisomerase (DNA) II binding protein                 | NM_007027    | protein C-terminus binding/isomerase activity                                                                                                                                                    | DNA replication and chromosome cycle/DNA metabolism                                                                                                                     |
| TPX2                    | Microtubule associated, homolog (Xenopus laevis)       | NM_012112    | GTP binding/ATP binding                                                                                                                                                                          | mitosis/cell proliferation                                                                                                                                              |
| TRIP13                  | Thyroid hormone receptor interactor 13                 | NM_004237    | transcription cofactor activity/adenosinetriphosphatase activity                                                                                                                                 | transcription from Pol II promoter                                                                                                                                      |
| TROAP                   | trophinin associated protein                           | NM_005480    | protein binding                                                                                                                                                                                  | cell adhesion                                                                                                                                                           |
| TTK                     | TTK protein kinase                                     | NM_003318    | protein-tyrosine kinase activity/ATP binding/protein serine/threonine kinase activity/transferase activity                                                                                       | mitotic spindle assembly/mitotic spindle checkpoint/positive regulation of cell proliferation/protein amino acid phosphorylation/regulation of cell cycle               |
| UBE2C                   | Ubiquitin protein E2-C                                 | NM_007019    | ATP binding/protein binding/ubiquitin-protein ligase activity/contributes to ubiquitin ligase activity                                                                                           | cell cycle/cell division/cyclin catabolic process/phosphatidylinositol-mediated signaling/free ubiquitin chain polymerization                                           |
| USP1                    | Ubiquitin specific protease 1                          | NM_003368    | ubiquitin-specific protease activity/cysteine-type endopeptidase activity/ubiquitin thiolesterase activity/hydrolase activity                                                                    | ubiquitin-dependent protein catabolism                                                                                                                                  |
| VCAN                    | Chondroitin sulfate proteoglycan 2 (versican)          | NM_004385    | sugar binding/hyaluronic acid binding/calcium ion binding                                                                                                                                        | cell recognition/development/heterophilic cell adhesion                                                                                                                 |
| WDR76                   | WD repeat domain 76                                    | NM_024908    | null                                                                                                                                                                                             | null                                                                                                                                                                    |
| ZNF367                  | Zinc finger protein 367                                | NM_153695    | DNA binding /metal ion binding/sequence-specific DNA binding transcription factor activity                                                                                                       | transcription, DNA-dependent                                                                                                                                            |
| ZWINT                   | ZW10 interactor                                        | NM_031423    | protein N-terminus binding/protein binding                                                                                                                                                       | cell cycle/cell division/phosphatidylinositol-mediated signaling                                                                                                        |
