# Supplementary material
Source: publisher figshare collection journal article supplement (https://plos.figshare.com/articles/dataset/_/1049456)
Supplement: Supplementary file 1 [file 1 › Table_S2.pdf]

| <b>Table S2: Primer pairs for Real Time PCR</b> |                          |                         |
|-------------------------------------------------|--------------------------|-------------------------|
| <b>Gene</b>                                     | <b>Forward</b>           | <b>Reverse</b>          |
| BUB1B                                           | TAGGGCGTTTATGCAATGAG     | TCGCATCTGCTTTCCTAAAGTT  |
| BUB3                                            | ACTCGCTGCATACGAGCGTT     | TGTACCTCAGGGCTTGGGTC    |
| CCNE2                                           | TCCAAGAGTTTGCTTACGTAC    | GCCAGGAGATGATTGTTACAGG  |
| CDCA2                                           | ATGACAGACTTGACCAGAAAGGA  | CCGACGTTTGAGAGACAACA    |
| CDCA4                                           | CTCCCTCCACGTCTTCCTC      | CTGGCTGAGCAGAGGACC      |
| CDCA7                                           | TCCGACTCACAATCAAGGAGA    | GGTAGAGCGTCAAGGGACC     |
| DEK                                             | TCATCGTGGAAGGCAAGAGG     | TCTGCCCCCTTTCCTTGTGC    |
| DHFR                                            | AAATGAGCTCCTTGTGGAGG     | ACCTGGTTCTCCATTCTCTGA   |
| FOXN1                                           | TGCCCAGCAGTCTCTTACCT     | CTACCCACCTTCTGGCAGTC    |
| H3F3B                                           | CTTTCGTGGCCAGCTGTT       | GTCGGAGAAGTGGCCTAAAA    |
| HAT1                                            | CATCCCCAAAGAGTTGATGG     | GCAGTGGAGAAGAACTGGC     |
| ID4                                             | CCGAGCCAGGAGCACTAGAG     | CTTGGAATGACGAATGAAAACG  |
| KHDRBS1                                         | GCACTCGCTCTTTCAGTTTC     | TTCACTCACGCCATGCAG      |
| MKI67                                           | CCACACTGTGTCGTGCTTTG     | CCGTGCGCTCATCCATTCA     |
| NETO2                                           | ATGGCAAAGAAAGTGCTGC      | GAATGTGGGCAGATGAAGGT    |
| NRP1                                            | TTGCAGTCTCTGTCTCCCAA     | GAAAAATGCGAATGGCTGAT    |
| NUSAP1                                          | AAACTTACAAACAACCCCATCTCC | GTTTCTTCCGTTGCTCTTCCTTT |
| PCOLCE                                          | CTCCTCCGAAGGGAATGAAC     | GCAGCTTGACTTTAGGCTCAG   |
| RAD51                                           | TATCCAGGACATCACTGCCA     | GGTGAAGGAAAGGCCATGTA    |
| RAD51AP1                                        | TCGTCATTATCCTCACTCTCACA  | CTTCTGGAAGGCAGTGATGG    |
| RFC2                                            | GTGAGCAGGCTAGAGGTCTTT    | ATTGAGTTCCAACATGGCATC   |
| RFC3                                            | TGCTGAGCATCTTTGGTGAG     | AACAGTGGCACAATCACAACA   |
| SENP1                                           | TCGCTCCATCAGCATATTCA     | GCATTTTCGCCTGACCATTAC   |
| SOCS2                                           | GGAGGACGGATGACAAAGTC     | AGACACTCTCCGGACTGAGG    |
| TMPO                                            | CAACCATTATGTCCTGAGAGGTC  | GTGGCGGAGAAATTAGTTGTGA  |
| TNC                                             | TTCAGCAGAATTGGGGATTT     | ACCTAGGTCTCTCGCCCATC    |
| VCAN                                            | CACTCTTTTGACGCCTCCTC     | TCTCCCCAGGAACTTACGA     |
| ZNF367                                          | AATCGCGGACAGTATCTGCT     | GTGAGGACGAGGAGGAAGC     |
| ZWINT                                           | CAGGCCTACAGGTTCCAAGA     | CTGGAAAGATGGAGGCAGC     |
