# Supplementary material
Source: publisher figshare collection journal article supplement (https://plos.figshare.com/articles/dataset/_/1049456)
Supplement: Supplementary file 1 [file 1 › Table_S3.pdf]

**Table S3: primer pairs for plasmid construction.**

|             | <b>Primer pairs for luciferase plasmid construction</b>                     |                                       |
|-------------|-----------------------------------------------------------------------------|---------------------------------------|
| <b>Gene</b> | <b>Forward</b>                                                              | <b>Reverse</b>                        |
| NUSAP1      | 5'-TAATTTTTTTAACATCTTGTAATA-3'                                              | 5'-ATGACAATGAGAAAAAATTTTA-3'          |
| CDCA2       | 5'-TTGACATTTTCCTGCAGAGTCTGTG-3'                                             | 5'-TTTTCTATCTGAATGATGAAGAACTTA-3'     |
| BUB1b       | 5'-GCTAGGCAATCAAGTCTC-3'                                                    | 5'-TTAGAAGCACAAATTTAACAG-3'           |
| FOXM1       | 5'-AGCCCTGCCCTTGCCCCTGT-3'                                                  | 5'-TGTCCACCTTCGCTTTTATTG-3'           |
| ID4         | 5'-GCCGCGCTGTCCAGGTGT-3'                                                    | 5'-TACAAGACAGAGAAATCTACT-3'           |
| OLFM4       | 5'-CACTAGAGATCTAGGACAT-3'                                                   | 5'-TAGAATATATAAGCATGCC-3'             |
|             | <b>Primer pairs for CMV-CDCA2 and CMV-ID4 plasmids construction</b>         |                                       |
| <b>Gene</b> | <b>Forward</b>                                                              | <b>Reverse</b>                        |
| CDCA2       | 5'-ATGGATGCCAATTCAAAGACAAGC-3'                                              | 5'-TCACTGCTTTCTTTCTCCATTATGTTCAATC-3' |
| ID4         | 5'-ATGAAGGCGGTGAGCCCGGTGCGC-3'                                              | 5'-TCAGCGGCACAGAATGCTGTCGCC-3'        |
|             | <b>Oligos for point mutation of SAmiR-486-5p seed region on ID4's 3'UTR</b> |                                       |
| sense       | 5'-CACCTTATCAGTTTTTAAGTAAGGGGTTTTATAGTGTAATATATACAG-3'                      |                                       |
| antisense   | 5'-CTGTATATATTACACTATAAAACCCCTTACTTAAAACTGATAAGGTG-3'                       |                                       |
|             | <b>Oligos for point mutation of SAmiR-494 seed region on CDCA2's 3'UTR</b>  |                                       |
| sense       | 5'-TCCCATTCTCTGTTCAACCTCAGTGCATCAAAAGTTCCTAATAAATAAACTC-3'                  |                                       |
| antisense   | 5'-GAGTTTATTTATTAGGAACCTTTTGATGCACTGAGGTTGAACAGAGAATGGGA-3'                 |                                       |
